# Supplementary material for: The relationship between mushroom consumption and cognitive performance among middle-aged and older adults: a cross-sectional study
Source: Royal Society of Chemistry journal article supplement (doi:10.1039/d3fo01101a), 2023-01-01
Supplement: d3fo01101a1.pdf [file d3fo01101a1.pdf]

## Online supporting material

### **The relationship between mushroom consumption and cognitive performance among middle-aged and older adults: a cross-sectional study**

#### **Table of Contents**

|                                                                                                                         |   |
|-------------------------------------------------------------------------------------------------------------------------|---|
| Supplementary Table 1. Sex stratified analysis of relationship between the mushroom intake and cognitive function ..... | 2 |
| Supplementary Table 2. Age stratified analysis of relationship between the mushroom intake and cognitive function ..... | 3 |

**Supplementary Table 1. Sex stratified analysis of relationship between the mushroom intake and cognitive function**

|                   | Mushroom consumption        |                                 |                                  |                             |
|-------------------|-----------------------------|---------------------------------|----------------------------------|-----------------------------|
|                   | Quartile 1<br>(0-4.00 g /d) | Quartile 2<br>(4.01-10.42 g /d) | Quartile 3<br>(10.43-20.84 g /d) | Quartile 4<br>(>20.84 g /d) |
| Composite z-score |                             |                                 |                                  |                             |
| Men               | 0 (ref)                     | 0.19 (-0.03, 0.41)              | 0.01 (-0.21, 0.23)               | 0.11 (-0.11, 0.34)          |
| Women             | 0 (ref)                     | 0.09 (0.02, 0.17)               | 0.14 (0.07, 0.22)                | 0.14 (0.06, 0.22)           |
| AVLT              |                             |                                 |                                  |                             |
| Men               | 0 (ref)                     | 2.27 (-1.13, 5.67)              | -1.17 (-4.54, 2.2)               | 1.01 (-2.39, 4.41)          |
| Women             | 0 (ref)                     | -0.03 (-1.32, 1.26)             | 1.10 (-0.13, 2.33)               | 1.30 (0.003, 2.59)          |
| VFT               |                             |                                 |                                  |                             |
| Men               | 0 (ref)                     | 1.29 (-0.26, 2.85)              | -0.22 (-1.77, 1.32)              | 0.30 (-1.26, 1.85)          |
| Women             | 0 (ref)                     | 0.60 (0.06, 1.15)               | 0.68 (0.16, 1.20)                | 0.54 (0.00, 1.08)           |
| DSST              |                             |                                 |                                  |                             |
| Men               | 0 (ref)                     | 0.86 (-1.97, 3.69)              | 1.20 (-1.61, 4.01)               | 2.41 (-0.42, 5.25)          |
| Women             | 0 (ref)                     | 0.97 (-0.11, 2.05)              | 1.11 (0.08, 2.14)                | 1.15 (0.07, 2.23)           |
| TMT-B             |                             |                                 |                                  |                             |
| Men               | 0 (ref)                     | -4.78 (-17.02, 7.45)            | -2.72 (-14.86, 9.42)             | -1.87 (-14.11, 10.37)       |
| Women             | 0 (ref)                     | -4.60 (-8.37, -0.82)            | -6.07 (-9.67, -2.47)             | -6.36 (-10.14, -2.58)       |
| MCI               |                             |                                 |                                  |                             |
| Men               | 1 (ref)                     | 0.45 (0.14, 1.44)               | 0.54 (0.18, 1.64)                | 0.68 (0.23, 2.03)           |
| Women             | 1 (ref)                     | 0.81 (0.56, 1.16)               | 0.50 (0.34, 0.72)                | 0.50 (0.33, 0.74)           |

Adjusted for age, gender, education level, marital status, smoking status, alcohol intake, physical activity, sleep quality, total energy intake, fish intake, vegetable intake, fruit intake, body mass index, hypertension, diabetes, cardiovascular disease, and depressive symptoms.

**Supplementary Table 2. Age stratified analysis of relationship between the mushroom intake and cognitive function.**

|                   | Mushroom consumption        |                                 |                                  |                             |
|-------------------|-----------------------------|---------------------------------|----------------------------------|-----------------------------|
|                   | Quartile 1<br>(0-4.00 g /d) | Quartile 2<br>(4.01-10.42 g /d) | Quartile 3<br>(10.43-20.84 g /d) | Quartile 4<br>(>20.84 g /d) |
| Composite z-score |                             |                                 |                                  |                             |
| <65               | 0 (ref)                     | 0.07 (-0.03, 0.16)              | 0.13 (0.04, 0.22)                | 0.15 (0.05, 0.25)           |
| ≥65               | 0 (ref)                     | 0.17 (0.05, 0.29)               | 0.13 (0.01, 0.24)                | 0.11 (0.00, 0.23)           |
| AVLT              |                             |                                 |                                  |                             |
| <65               | 0 (ref)                     | -0.33 (-1.95, 1.29)             | 0.73 (-0.84, 2.30)               | 1.54 (-0.13, 3.20)          |
| ≥65               | 0 (ref)                     | 1.13 (-0.69, 2.96)              | 1.07 (-0.63, 2.78)               | 0.88 (-0.88, 2.63)          |
| VFT               |                             |                                 |                                  |                             |
| <65               | 0 (ref)                     | 0.72 (0.06, 1.39)               | 0.81 (0.17, 1.46)                | 0.63 (-0.05, 1.32)          |
| ≥65               | 0 (ref)                     | 0.61 (-0.19, 1.4)               | 0.28 (-0.46, 1.03)               | 0.22 (-0.54, 0.98)          |
| DSST              |                             |                                 |                                  |                             |
| <65               | 0 (ref)                     | 0.02 (-1.27, 1.3)               | 0.9 (-0.34, 2.15)                | 1.43 (0.11, 2.75)           |
| ≥65               | 0 (ref)                     | 2.67 (1.04, 4.3)                | 1.43 (-0.09, 2.96)               | 0.99 (-0.58, 2.55)          |
| TMT-B             |                             |                                 |                                  |                             |
| <65               | 0 (ref)                     | -4.07 (-8.3, 0.15)              | -5.69 (-9.79, -1.59)             | -5.31 (-9.65, -0.97)        |
| ≥65               | 0 (ref)                     | -5.69 (-12.09, 0.72)            | -6.16 (-12.15, -0.17)            | -6.77 (-12.93, -0.61)       |
| MCI               |                             |                                 |                                  |                             |
| <65               | 1 (ref)                     | 0.82 (0.51, 1.31)               | 0.44 (0.26, 0.74)                | 0.38 (0.21, 0.68)           |
| ≥65               | 1 (ref)                     | 0.70 (0.43, 1.16)               | 0.55 (0.34, 0.90)                | 0.69 (0.43, 1.13)           |

Adjusted for age, gender, education level, marital status, smoking status, alcohol intake, physical activity, sleep quality, total energy intake, fish intake, vegetable intake, fruit intake, body mass index, hypertension, diabetes, cardiovascular disease, and depressive symptoms.
